# Supplementary material
Source: Springer Nature journal article supplement (https://www.springermedizin.de/resource/supplementary/12876_2012_748_MOESM3_ESM.pdf/9437442)

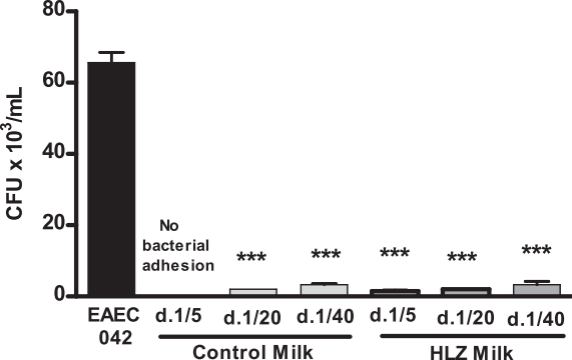

Supplement: MOESM3 [file 9437442]
